# Supplementary material
Source: PubMed Central journal article supplement (PMC4363444)
Supplement: IAI.03122-14_zii999091170so1.pdf [file IAI.03122-14_zii999091170so1.pdf]

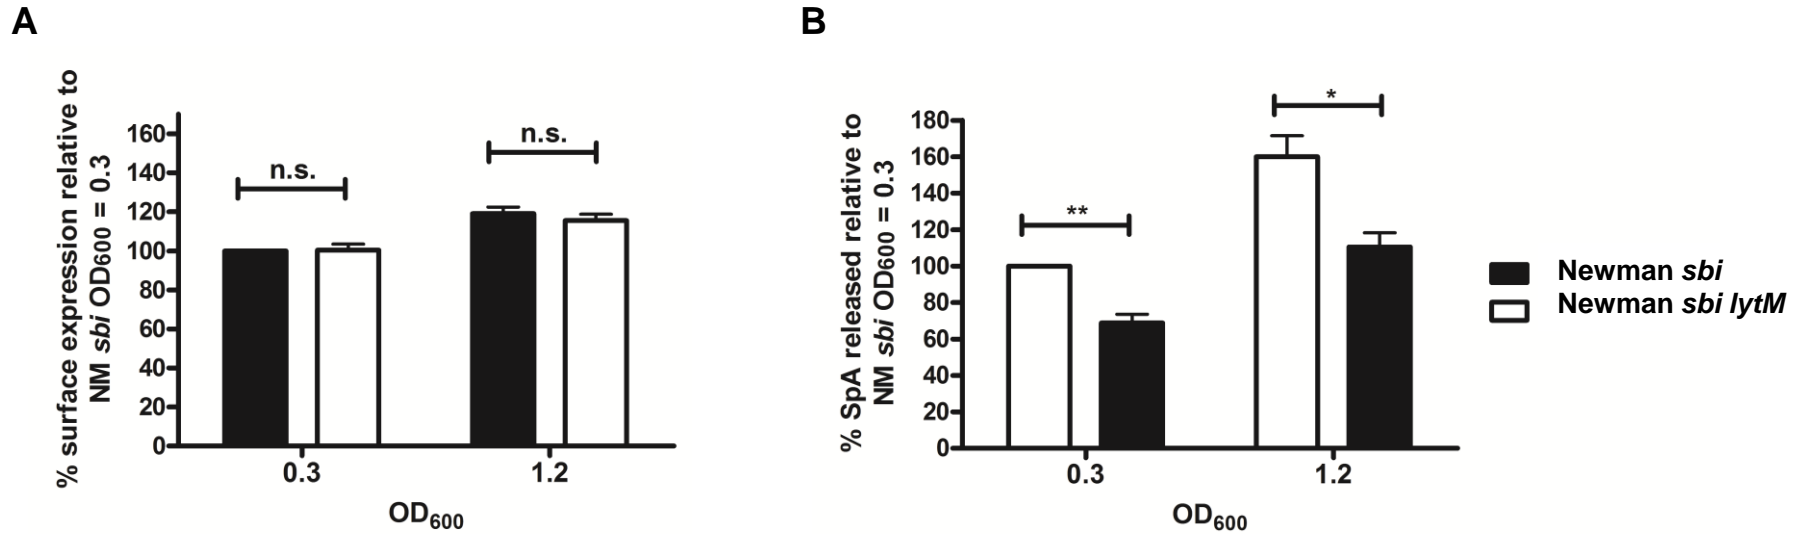

**Figure S1. LytM-mediated release of protein A by *S. aureus* Newman.**

A) Protein A on the surface of Newman *sbi* and Newman *sbi lytM* was detected using FITC-labelled rabbit IgG and the fluorescence intensity was measured by flow cytometry. Values are plotted as a percentage of the mean fluorescence intensity measured for NM *sbi* grown to an OD<sub>600</sub> of 0.3. Bars represent the mean values and error bars indicate the SEM of three independent experiments.

B) Protein was captured from culture supernatants using chicken anti-SpA polyclonal IgY and detected using biotin-conjugated mouse monoclonal anti-SpA IgG followed by streptavidin-HRP in an ELISA. Values are expressed as a percentage of total released SpA measured for Newman *sbi* grown to an OD<sub>600</sub> = 0.3. Bars represent the mean percentage release from four independent experiments. Error bars represent the SEM. \*\*  $p = 0.003$ , \*  $p = 0.014$ , n.s. = not significant,  $p > 0.05$ .

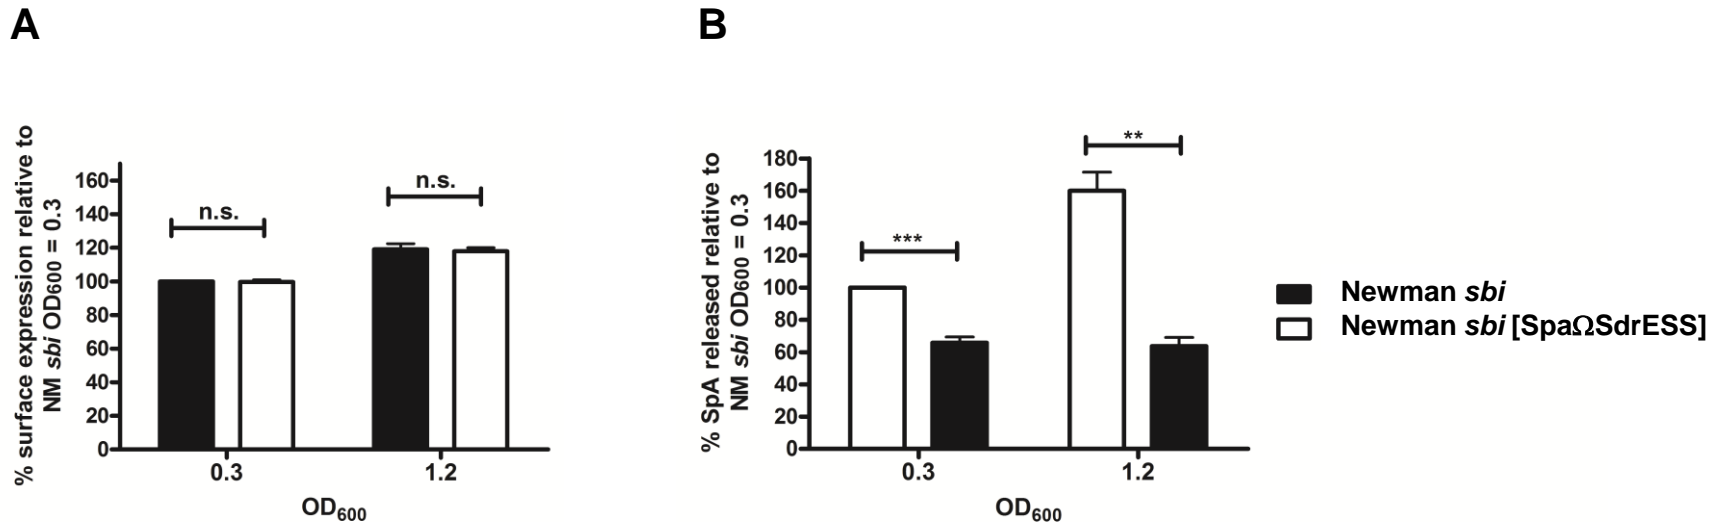

**Figure S2. Replacing the SpA sorting signal with the sorting signal from SdrE reduces release of SpA by *S. aureus* Newman**

- A) Protein A on the surface of Newman *sbi* and Newman *sbi* [SpAΩSdrESS] was detected using FITC-labelled rabbit IgG and the fluorescence intensity was measured by flow cytometry. Values are plotted as a percentage of the mean fluorescence intensity measured for Newman *sbi* grown to an OD<sub>600</sub> of 0.3. Bars represent the mean values and error bars indicate the SEM of three independent experiments.
- B) Protein was captured from culture supernatants using chicken anti-SpA polyclonal IgY and detected using biotin-conjugated mouse monoclonal anti-SpA IgG followed by streptavidin-HRP in an ELISA. Values are expressed as a percentage of total released SpA measured for Newman *sbi* grown to an OD<sub>600</sub> = 0.3. Bars represent the mean percentage release from four independent experiments. Error bars represent the SEM. \*\*\*  $p < 0.001$ , \*\*  $p = 0.02$ , n.s. = not significant,  $p > 0.05$ .

**TABLE S1. Oligonucleotides used in this study.**

| <b>Oligonucleotide name</b> | <b>5' - 3' sequence<sup>a, b</sup></b>                      |
|-----------------------------|-------------------------------------------------------------|
| <b>pSLF</b>                 | GAATTCACTGGCCGTCGTTTTACAACGTCG                              |
| <b>pSLR</b>                 | GAGCTCAGATCTGTTAACGGTACCATCATA                              |
| <b>SpAF</b>                 | <u>TATGATGGTACCGTTAACAGATCTGAGCTCTACAGGGGGTATTAATTTG</u>    |
| <b>SpAR</b>                 | <u>CGACGTTGTAAAACGACGGCCAGTGAATTCTTATAGTTCGCGACGACG</u>     |
| <b>RESF</b>                 | <u>CAGATGCTAACAAAGCTCAAGCATTACCAGAAACAGGTAGTG</u>           |
| <b>RESR</b>                 | <u>GTAAAACGACGGCCAGTGAATTC</u> TTATTTGTTTTGTTTTTTGCGAC      |
| <b>DWRrR</b>                | TGGCGCCACTTTCTTTTCAGCATC                                    |
| <b>DSpF</b>                 | <u>GATGCTGAAAAGAAAGTGGCGCCATTACCAGAAACTGGTGAAG</u>          |
| <b>DSdF</b>                 | <u>GATGCTGAAAAGAAAGTGGCGCCATTACCAGAAACAGGTAGTG</u>          |
| <b>SEQF</b>                 | ATTCAGGCTGCGCAAC                                            |
| <b>SEQR</b>                 | TTGTTGACATTATATCATTG                                        |
| <b>lytm-A</b>               | GGAGGTACCCAATCACTATACGATGTATCAGAC                           |
| <b>lytM-B</b>               | CATGTATAAAACATCCTCCATTAAG                                   |
| <b>lytM-C</b>               | TTAATGGAGGATGTTTTATACATGTAATACAGAAAATCCCAAGTTG              |
| <b>lytM-D</b>               | GGAGAGCTCAAAGACAAATACAAAATCACATC                            |
| <b>pSRER</b>                | TTATTTGTTTTGTTTTTTGCGAC                                     |
| <b>SpADSF</b>               | <u>CGTCGCAAAAAACAAAACAAATAAAAAACAAACAATACACAACGATAG</u>     |
| <b>SpADSR</b>               | <u>CGACGTTGTAAAACGACGGCCAGTGAATTCATTTCACAAGCGGTTTCATTAC</u> |
| <b>pIREF</b>                | <u>CCTCACTAAAGGGAACAAAAGCTGGGTACCAAGCCTTAAAGACGATC</u>      |
| <b>pIRER</b>                | <u>CGACTCACTATAGGGCGAATTGGAGCTCTCAACAAGCGGTTTCATTAC</u>     |
| <b>pIMAYF</b>               | GGTACCCAGCTTTTGTTCCTTTAGTGAGG                               |
| <b>pIMAYR</b>               | GAGCTCCAATTCGCCCTATAGTGAGTCG                                |

<sup>a</sup>\* indicates a 5' phosphorylation modification

<sup>b</sup>5' extensions with homology to vector sequences were added to facilitate sequence and ligase-independent cloning (underlined).
